# Supplementary material for: Quality of life in children with glaucoma: a qualitative interview study in Australia
Source: HighWire-hosted journal article supplement (doi:10.1136/bmjopen-2022-062754), 2022-07-01
Supplement: bmjopen-2022-062754supp001_data_supplement.pdf [file bmjopen-2022-062754supp001_data_supplement.pdf]

**Supplementary File 1. Semi-structured interview guide for children with glaucoma****Period of diagnosis/Emotional**

What is it like growing up with glaucoma?

**School and Cognitive Functioning**

What is school like for you?

Do you think your eyes make some things harder to learn? (like maths, science or geography?)

Do you find it challenging to read your books or papers at school?

How do you find reading the board or laptop in your classroom?

Are you confident to ask for help at school?

How do you feel about the help that you get?

Do you keep up with other children in the classroom or do things take longer for you to finish?  
Can you tell me why?

Do you feel like your teachers and other children at school understand your eyes?

What do you like to do at playtime or recess? Do you do the same as your friends? Is it because of your eyes?

Can you find your friends easily in the playground? Why not?

Do you think you will finish high school? Why/why not?

Do you think that your glaucoma will determine what you do in the future for work or study?

Are you worried about it?

**Relationships**

Because of your glaucoma, do you find it easy to make friends?

Do you get along with your brothers and sisters? Do you think that's because of your eyes?

Do you feel that your family and friends understand your eye problem? Why/why not?

Does having glaucoma make you feel different to your friends or brothers or sisters? Why/why not?

Do you feel like other children treat you differently because of your eyes? Can you explain that?

Do you tell your friends about your eyes? Why/why not?

Do your family and friends need to help you do some things? Like what?

Do they give you enough help?

*(For older children if appropriate)* Have you ever been worried if your children will have glaucoma too?

### **Role Performance and Leisure**

Has your eye problem made it hard to do some activities such as sports, playing on the playground, going to the movies, or playing video games?

How does that make you feel?

What do you do when you find something hard to do?

### **Psychological**

Do you worry about your eyes? Why/why not?

Do you ever feel sad or angry about your eyes? What cheers you up?

*(For older children if appropriate)* What worries, or concerns do you have regarding the future?

### **Treatment/Medical Care**

How does going to the eye doctor make you feel? Do you miss out on things because you have to go?

Prompting questions: Do you get nervous before you go? Why? (e.g., reading the vision chart, pressure test, needing eye drops, doing a visual field test, waiting a long time)

Do you feel like your eye doctor helps you? Do you ask questions?

How does putting in eye drops every day make you feel (if applicable)?

### **Mobility/Autonomy**

How do you get to school? Can you catch the bus to school by yourself?

Do you find it hard to cross the road, or go up and down stairs, riding a bike?

Do you feel that you bump into things a lot? When does it happen or what sort of things do you bump into?

Are you worried about driving a car when you're older?

### **Low Vision Aids**

Do you use any special computers or iPads to make things bigger?

Do you like using them?

Does using them make you feel different?
