# Supplementary material for: Quality of life in children with glaucoma: a qualitative interview study in Australia
Source: HighWire-hosted journal article supplement (doi:10.1136/bmjopen-2022-062754), 2022-07-01
Supplement: bmjopen-2022-062754supp003_data_supplement.pdf [file bmjopen-2022-062754supp003_data_supplement.pdf]

**Table S1.** Characteristics of children who enrolled and were interviewed compared to individuals who could not be contacted or declined participation.

| Characteristic                       | Individuals enrolled and interviewed, n (%) <sup>†</sup><br>(n=18) | Could not be contacted or declined participation, (n, %) <sup>†</sup><br>(n=36) | p value                   |
|--------------------------------------|--------------------------------------------------------------------|---------------------------------------------------------------------------------|---------------------------|
| Current age, years (median [IQR])    | 12.1 (9.7–14.5)                                                    | 14.2 (11.4–16.0)                                                                | 0.14 <sup>‡</sup>         |
| Current age, ≥13 years               | 8 (44)                                                             | 21 (58)                                                                         | 0.50 <sup>§</sup>         |
| Years at diagnosis (median [IQR])    | 0.5 (0.2–4.0)                                                      | 0.5 (0.0–4.8)                                                                   | 0.89 <sup>‡</sup>         |
| Age at diagnosis, ≥4 years           | 5 (28)                                                             | 10 (28)                                                                         | 1.00 <sup>§</sup>         |
| Years since diagnosis (median [IQR]) | 9.8 (7.3–13.6)                                                     | 11.2 (8.5–13.7)                                                                 | 0.72 <sup>‡</sup>         |
| Gender, female                       | 6 (33)                                                             | 17 (47)                                                                         | 0.50 <sup>§</sup>         |
| Laterality of glaucoma, bilateral    | 11 (61)                                                            | 34 (94)                                                                         | <b>0.004</b> <sup>¶</sup> |
| Self-reported ancestry, European     | 16 (89)                                                            | 21 (60)*                                                                        | 0.06 <sup>§</sup>         |
| Glaucoma subtype, primary**          | 12 (67)                                                            | 28 (78)                                                                         | 0.51 <sup>¶</sup>         |
| BCVA better eye, impaired (<0.5)     | 3 (17)                                                             | 6 (17)                                                                          | 1.00 <sup>¶</sup>         |
| Molecular diagnosis identified       | 9 (50)                                                             | 9 (25)                                                                          | 0.13 <sup>§</sup>         |
| Family history, first degree         | 4 (22)                                                             | 17 (49)*                                                                        | 0.12 <sup>§</sup>         |

<sup>†</sup>: n (%) presented unless otherwise specified

<sup>‡</sup>Mann-Whitney U test

<sup>§</sup>Chi-square test with Yates' correction for continuity

<sup>¶</sup>Fisher exact test

\*Data missing for one individual (n=1)

\*\*Primary glaucoma includes primary congenital glaucoma and juvenile open-angle glaucoma

IQR: interquartile range; BCVA: best-corrected visual acuity
